# Supplementary material for: Co-Design of an Intervention to Increase the Participation in Leisure Activities Including Adolescents with Cerebral Palsy with GMFCS Levels IV and V: A Study Protocol
Source: J Clin Med. 2022 Dec 26;12(1):182. doi: 10.3390/jcm12010182 (PMC9821276; doi:10.3390/jcm12010182)
Supplement: Supplementary file 1 [file jcm-12-00182-s001.zip › jcm-2062042-supplementary.pdf]

**Supplementary Material.** Open questions directed to adolescents, families and health professionals related to their involvement in the co-design and their roles.

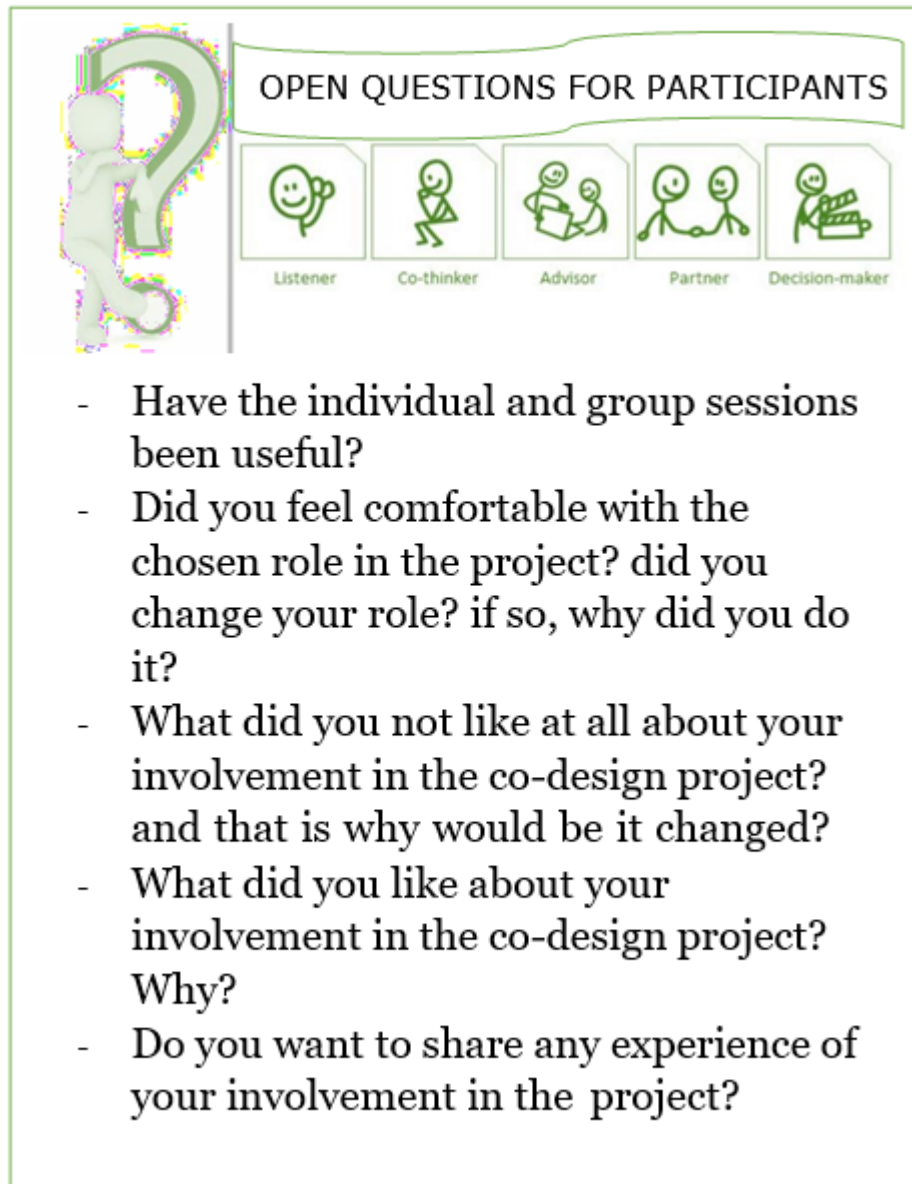

**OPEN QUESTIONS FOR PARTICIPANTS**

Listener Co-thinker Advisor Partner Decision-maker

- Have the individual and group sessions been useful?
- Did you feel comfortable with the chosen role in the project? did you change your role? if so, why did you do it?
- What did you not like at all about your involvement in the co-design project? and that is why would be it changed?
- What did you like about your involvement in the co-design project? Why?
- Do you want to share any experience of your involvement in the project?

**Figure S1.** Open questions for participants.
